# Supplementary material
Source: Springer Nature journal article supplement (https://www.springermedizin.de/resource/supplementary/12885_2009_1573_MOESM4_ESM.pdf/9472354)

A

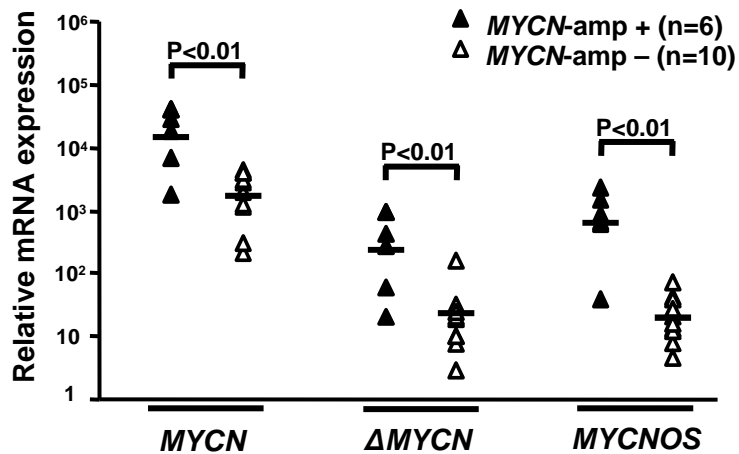

B

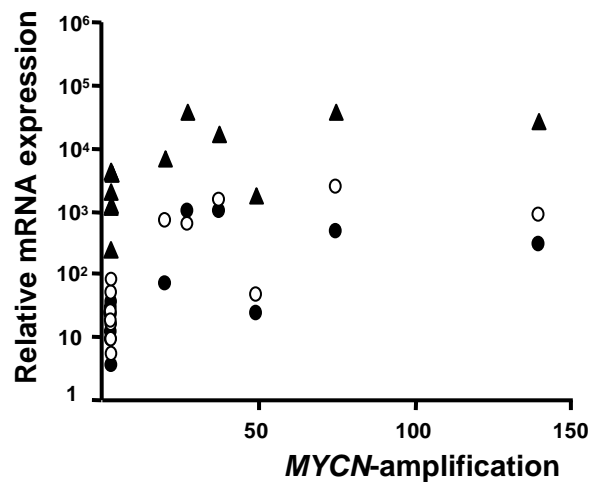

C

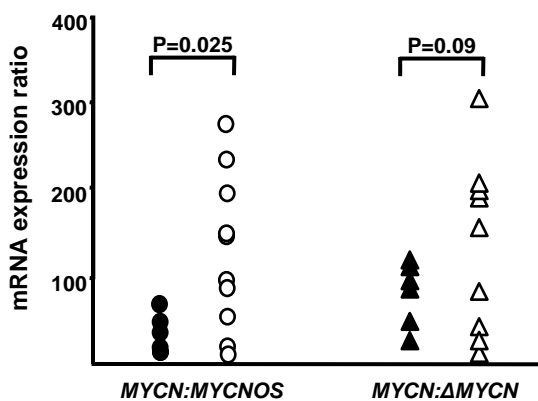

D

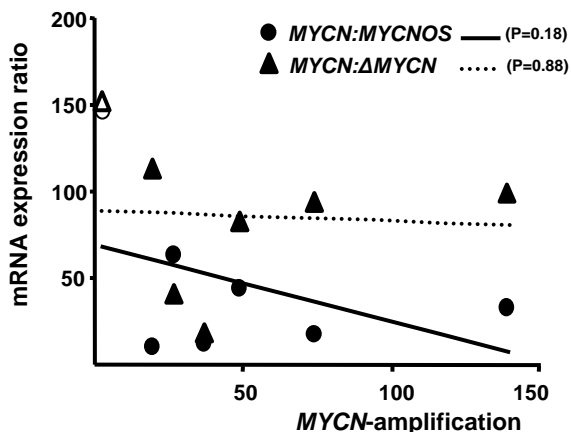

E

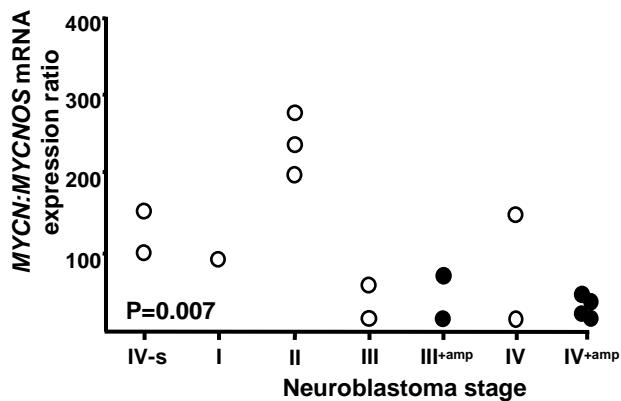

F

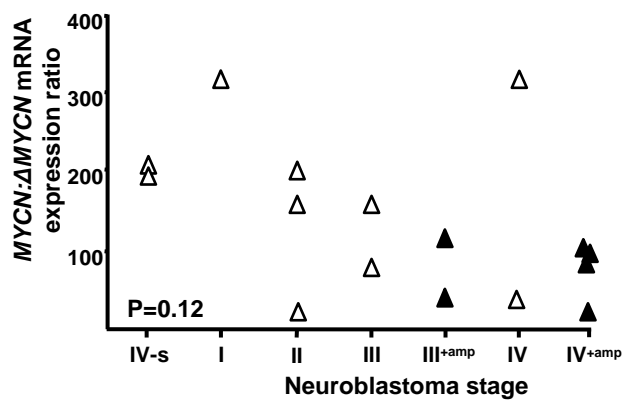

Supplement: MOESM4 [file 9472354]
